# Supplementary material for: Regulatory Effects of Nur77 on Airway Remodeling and ASMC Proliferation in House Dust Mite-Induced Asthma
Source: Hindawi journal article supplement (doi:10.1155/2020/4565246), 2020-11-19
Supplement: f1 [file 4565246.f1.doc]

**Supplementary Materials for**

**Regulatory Effects of Nur77 on Airway Remodeling and ASMC Proliferation**

**in House Dust Mite-Induced Asthma**

Kun Wang, PhDa,b,c, 1, Muyun Wang, MDb, 1, Yan Shang, PhDd, Yanan He, MDb, Qiang Li, MDb,Wei Gao, PhDb, *, Huiming Yin, MDa, *

a. Department of Pulmonary and Critical Care Medicine, First Affiliated Hospital, Hunan University School of Medicine, Huaihua 418000, China

b. Department of Pulmonary and Critical Care Medicine, Shanghai East Hospital, Tongji University School of Medicine, Shanghai 200120, China

c. Department of Pulmonary and Critical Care Medicine, Shanghai General Hospital, Shanghai Jiaotong University School of Medicine, Shanghai 201620, China

d. Department of Respiratory and Critical Care Medicine, Changhai Hospital, Naval Medical University (Second Military Medical University), Shanghai 200433, China

1 These authors contributed equally to the paper

* Corresponding authors:

Wei Gao. Email: grace19881118@126.com

Huiming Yin. Email: 1976841746@qq.com

**Running title**: Nur77 in asthma

**Methods**

**1. Bronchoalveolar lavage fluid (BALF) acquisition and analysis**

After anesthetization, disinfection and tracheotomy of mice, 0.8 mL pre-cooled sterile saline was slowly injected through tracheal cannula and then carefully withdrawn. The retrieving volume was generally >70% of total injected fluid. Then, the obtained bronchoalveolar lavage fluid (BALF) sample was centrifuged at 1200 rpm for 10 min at 4°C to collect BAL cells. Meanwhile, BALF supernatants were dispensed and stored at -80°C prior to the cytokine measurements by Luminex-based Procarta custom 10-plex assay (eBioscience, San Diego, CA).

The supernatants were diluted 1:1 and 1:10 in RPMI medium for Luminex assay according the manufacturer's protocol. The 10 cytokines quantified in the assay included: IL-4, IL-5, IL-13, Ig-E, IL-10, IFN-γ, IL17A, IL33, TGF-β, VEGF. Mean Fluorescence intensity of the samples was interpolated from the standard curves to analyte quantity using five-parameter logistical fit.

**2.** **Histological analysis of lung tissues**

In a separate experiment, the left lung lobes of mice were removed without bronchoalveolar lavage and placed in tissue clips immersed in 10% neutral formaldehyde. Then paraffin embedding and pathological sections were performed successively. The embedded waxes were cut into 4 μm slices and flattened on a glass slide, followed by hematoxylin-eosin (H&E), Periodic Acid-Schiff (PAS) and Masson’s trichrome staining to visualize inflammatory cell infiltration, airway global cells and mucus production, as well as collagen deposition and fibrosis, respectively. The mucus production of goblet cells was determined by counting PAS-positive cells per bronchiole under microscope in a double-blind manner. Additionally, immunohistochemical staining was also applied to assess the distribution and expression of Nur77, α-SMA and MMP-9 proteins.

**3. Cell culture and lentivirus transduction**

Normal human airway smooth muscle cells (ASMC) were purchased from PromoCell (Heidelberg, Germany). The cells were cultured in Smooth Muscle Cell Growth Media 2 (Ready-to-use) (Promocell) supplemented 100 U/mL penicillin and 100 μg/mL streptomycin (Thermo Fisher Scientific, Waltham, MA, USA). Only the fourth to the eighth passage of primary ASMC could be used for further experiments.

**4. In vitro investigation of ASMC proliferation**

ASMC cells were seeded at 5×104 cells/well in 96-well plates. After different treatments, cells in each group were washed twice with sterile phosphate buffered saline (PBS), followed by incubating with CCK-8 working solution (100 μL/well) at 37 °C for 1-2 h. The absorption of each sample was measured at 450 nm using a microplate reader (SpectraMax iD3, Molecular Devices, Sunnyvale, CA, USA). For EdU assay, ASMC DNA synthesis were examined by a Cell-Light™ EdU DNA Cell Proliferation Kit (Ribobio, Guangzhou, China) according to the manufacturer’s instructions. Images were obtained using a confocal microscope (Leica SP5, Germany).

**5. Cell cycle detection**

ASMCs were plated at 2×105 cells/well in 6-well plates and cultured overnight. After different treatments, each group cells were harvested and fixed in 75% ethanol at 4°C overnight. Then ASMCs were washed with precooled PBS for three times. After incubating with Propidium Iodide (PI, 50 μg/ml) and RNase A (50 μg/ml) for 30 min in dark, the cell cycle was analyzed by flow cytometry (Accuri C6, BD Biosciences).

**6. Western blotting (WB) analysis**

Whole cell extracts in all groups were prepared using RIPA buffer (Beyotime, China) and the concentrations were quantified by a BCA protein assay kit (Beyotime, China). Equal amounts of protein samples were loaded on a 10% (w/v) sodium dodecyl sulfate-polyacrylamide gels (SDS-PAGE), electrophoresed and transferred to PVDF membranes (Millipore, Bedford, Massachusetts). Nonspecific sites were then blocked with tris-buffered saline (TBS) containing 5% (w/v) non-fat milk and 0.1% (v/v) Tween 20 for 2 hrs. The blots were incubated with distinct primary antibody: anti-Nur77 (SantaCruz, USA), anti-GAPDH, anti-phospho-AKT, anti-VEGF, anti-MFN2, anti-OPA1, anti-phospho-p38, anti-phospho-ERK1/2, anti-phospho-JNK, anti-β-Tublin (Cell Signaling Technology, USA) overnight at 4°C. Afterwards, blots were incubated with horseradish peroxidase (HRP)-conjugated secondary antibody for 1.5 hrs. The protein signals were imaged by Tanon-4200 image analyzer (Tanon Biotechnology, Shanghai, China) using ECL chemiluminescence method.

**7. Detection of intracellular reactive oxygen species (ROS)**

Primary human ASMC undergoing different treatments were plated in 96-well black plate with a density of 5×104/well and incubated with 10 μM DCFH-DA (Sigma-Aldrich, St. Louis, MO, USA) at 37°C in the dark for 15 min. Then cells were washed with serum-free DMEM for three times and the intracellular ROS was determined under Flexstation®2 fluorescence plate reader (Molecular Devices, San Jose, CA, USA) at 488/525 nm.

**8. Reverse transcription-polymerase chain reaction (RT-PCR) assay**

Total RNA was extracted from cells using TRIzol® reagent (Invitrogen, Carlsbad, CA, USA) according to the manufacturer’s instructions. Reverse transcription was performed by a Prime ScriptTM RT Master Mix Kit (TaKaRa, Japan). The specific primers for Nur77, Hemeoxygenase-1 (HO-1), uperoxide dismutase 2 (SOD2, MnSOD) and β-actin were generated by BioTNT (Shanghai, China). RT-PCR was conducted using a Power Green qPCR Mix (TaKaRa, Japan) and an ABI ViiATM 7 System. The mRNA levels were normalized to the endogenous housekeeping gene, β-actin, using the 2ΔΔCt method.

The sequences of forward and reverse primers were displayed below:

Nur77 - Forward: CCCTGAAGTTGTTCCCCTCAC,

Reverse: GCCCTCAAGGTGTGGAGAAG;

HO-1 - Forward: CTGCCCAAACCACTTCTGTT,

Reverse: ATAAGAAGGCCTCGGTGGAT;

SOD2 - Forward: ACAGGCCTTATTCCACTGCT,

Reverse: CAGCATAACGATCGTGGTTT;

β-actin - Forward: ACCGAGCGCGGCTACA,

Reverse: CAGCCGTGGCCATCTCTT.

**Results**

**Figure S1**. Impact of Nur77 expression on airway cytokines production in an HDM-induced asthmatic murine model.


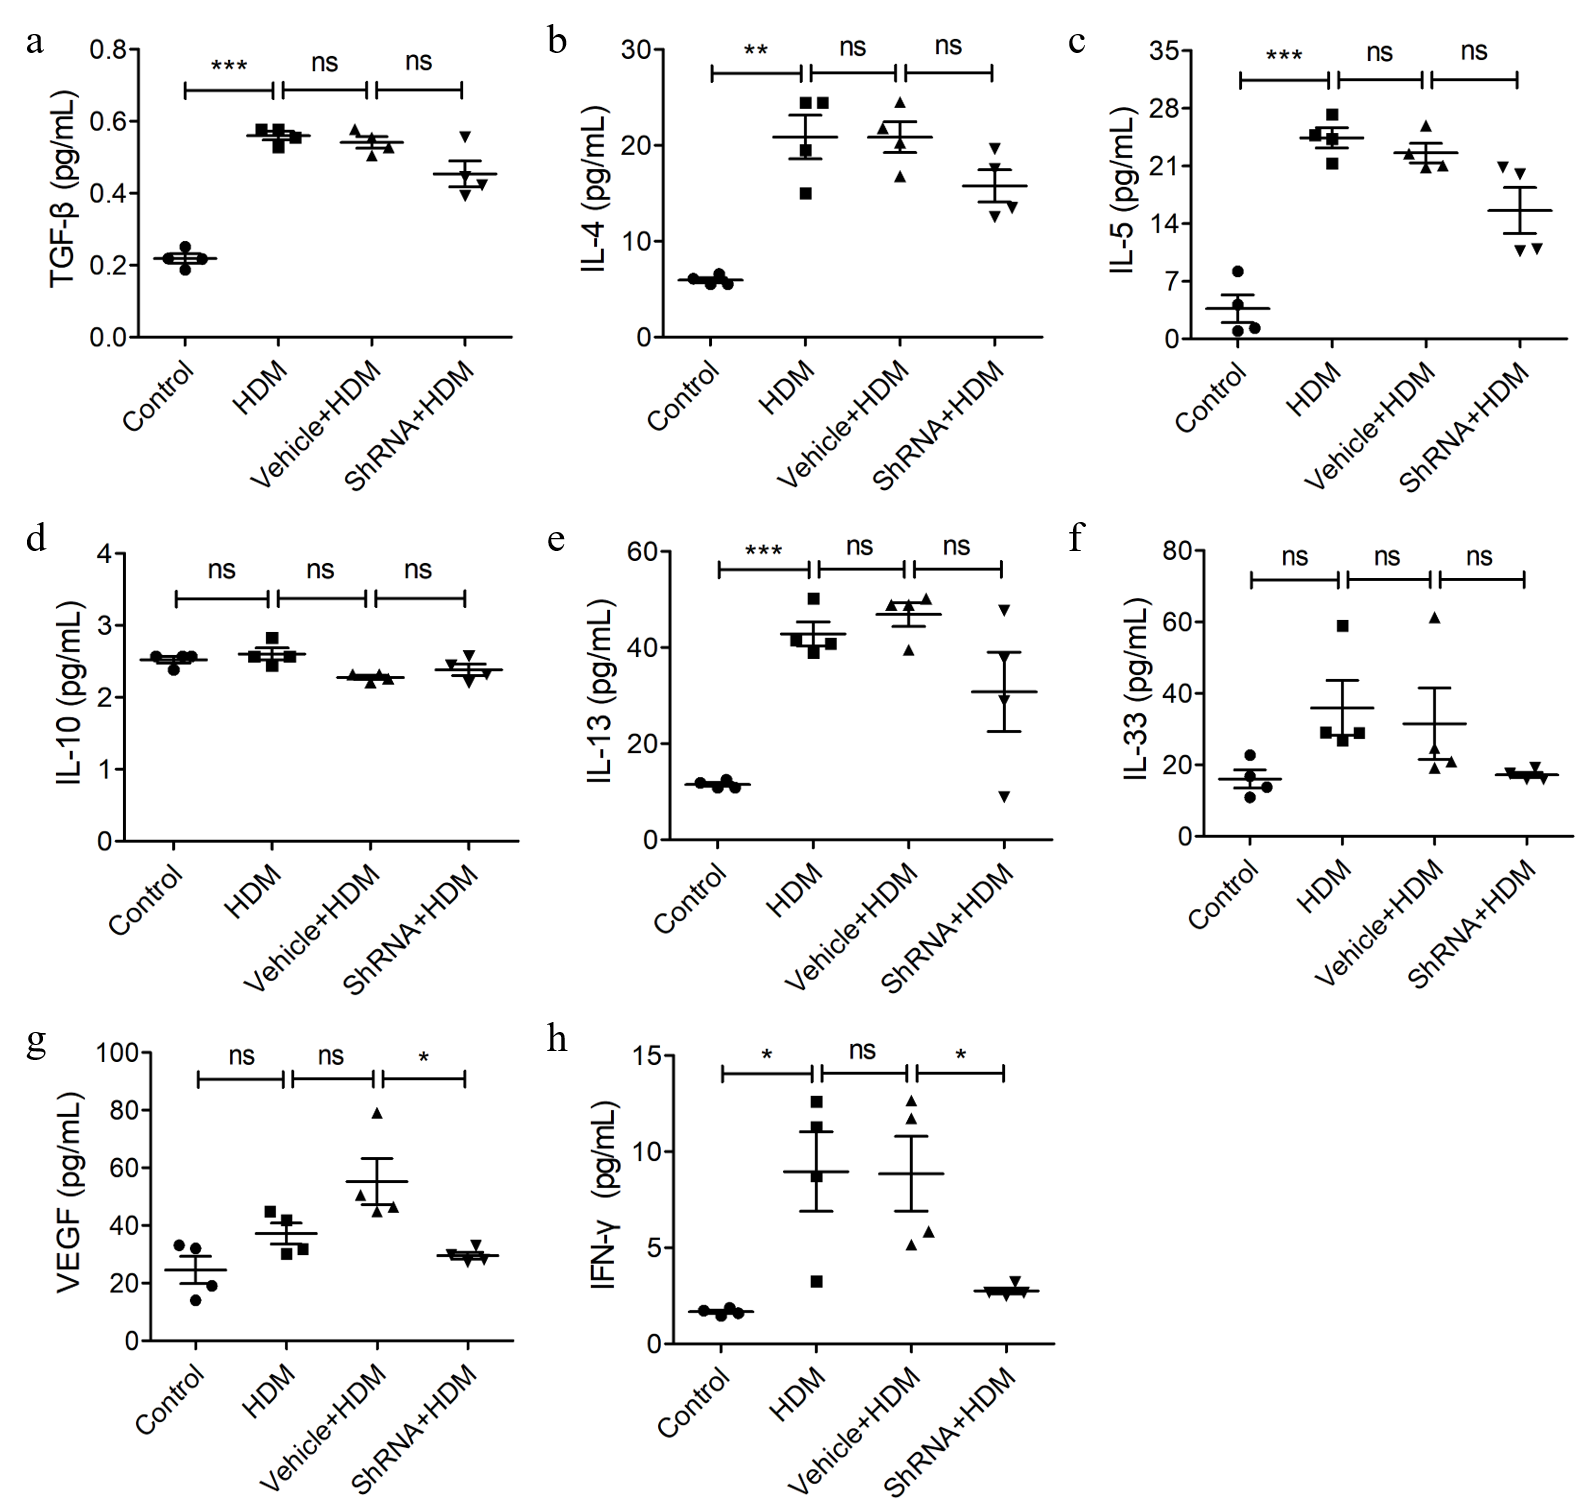


Fig. S1 BALF were collected for detecting TGF-β (a), IL-4 (b), IL-5 (c), IL-10 (d), IL-13 (e), IL-33 (f), VEGF (g) and IFN-γ(h) production. *p < 0.05, **p < 0.01, ***p < 0.001. ns, not signiﬁcant.

**Figure S2**. Effect of Nur77 depletion on cell cycle in HDM-challenged ASMCs.


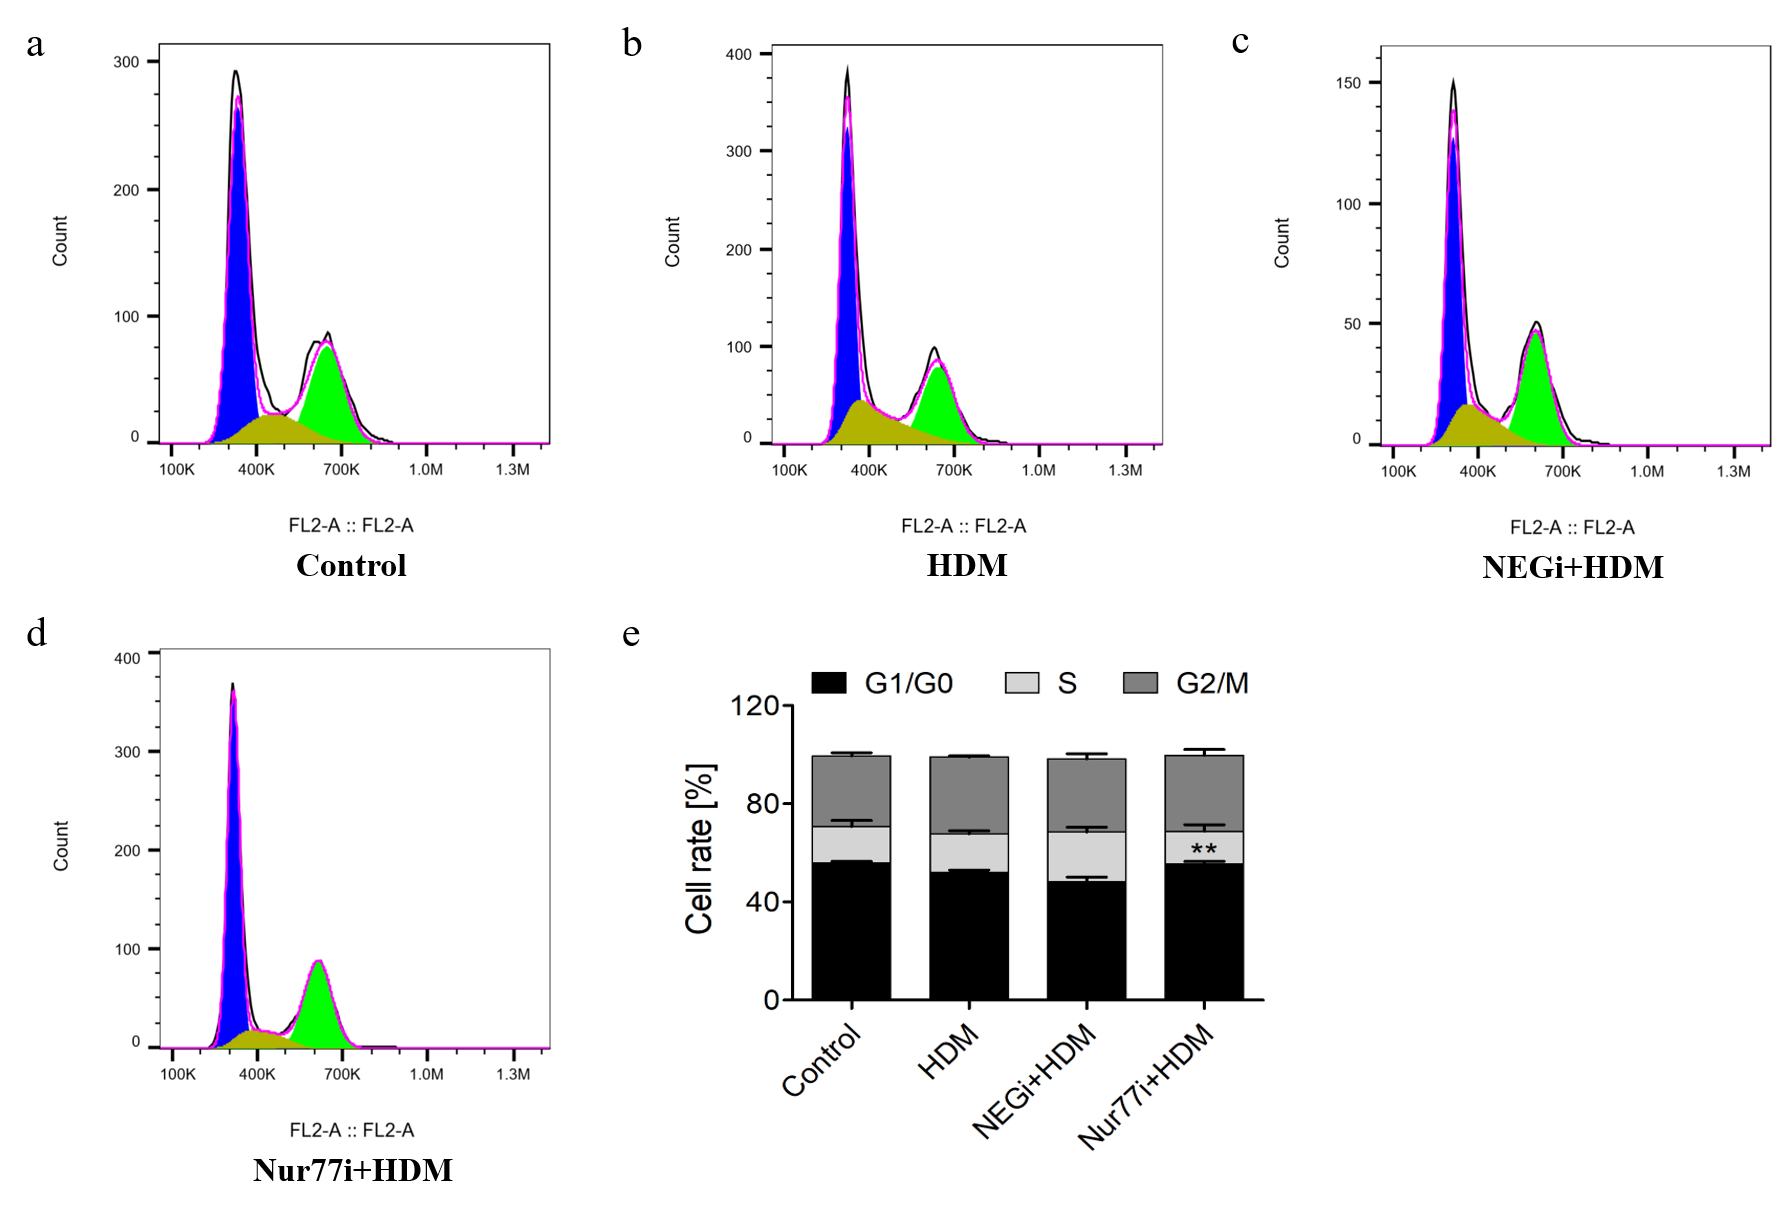


Fig. S2 Cell cycle of different experimental groups were evaluated by flow cytometry (a-d). The percentage distribution of ASMCs in each cell cycle phase after distinct treatment (e). **p < 0.01 compared with NEGi + HDM group.
